# Supplementary material for: Selective RET kinase inhibition for patients with RET-altered cancers
Source: PubMed Central journal article supplement — Ann Oncol. 2018 Apr 18;29(8):1869–76. doi: 10.1093/annonc/mdy137 (PMC6096733; doi:10.1093/annonc/mdy137), 2018-04-18
Supplement: mdy137_supplement.pdf [file mdy137_supplement.pdf]

## **SUPPLEMENTARY APPENDIX FOR:**

### **Selective RET Kinase Inhibition for Patients with *RET*-Altered Cancers**

V. Subbiah<sup>1\*</sup>, V. Velcheti<sup>2\*</sup>, B.B. Tuch<sup>3</sup>, K. Ebata<sup>3</sup>, N.L. Busaidy<sup>1</sup>, M.E. Cabanillas<sup>1</sup>, L.J. Wirth<sup>4</sup>, S. Stock<sup>2</sup>, S. Smith<sup>3</sup>, V. Lauriault<sup>3</sup>, S. Corsi-Travali<sup>3</sup>, D. Henry<sup>3</sup>, M. Burkard<sup>5</sup>, R. Hamor<sup>5</sup>, K. Bouhana<sup>5</sup>, S. Winski<sup>5</sup>, R.D. Wallace<sup>5</sup>, D. Hartley<sup>5</sup>, S. Rhodes<sup>5</sup>, M. Reddy<sup>5</sup>, B.J. Brandhuber<sup>3</sup>, S. Andrews<sup>3</sup>, S.M. Rothenberg<sup>3+</sup>, A. Drilon<sup>6+</sup>

\*Contributed equally. + corresponding authors

1 The University of Texas MD Anderson Cancer Center, Houston, United States

2 The Cleveland Clinic Foundation, Cleveland, United States

3 Loxo Oncology, Inc., Stamford, United States

4 Massachusetts General Hospital Cancer Center, Boston, United States

5 Array BioPharma, Inc., Boulder, United States

6 Memorial Sloan Kettering Cancer Center, United States

Corresponding authors

Dr. S. Michael Rothenberg

Loxo Oncology, Inc.

281 Tresser Blvd. 9<sup>th</sup> Floor

Stamford, CT 06901

United States

Phone: 1-720-577-6998

Email: [rothenberg@loxooncology.com](mailto:rothenberg@loxooncology.com)

Dr. Alexander Drilon

Memorial Sloan Kettering Cancer Center

1275 York Avenue

New York, NY 10065

United States

Phone: 1-646-888-4206

Email: [drilona@mskcc.org](mailto:drilona@mskcc.org)

## **CONTENTS**

**SUPPLEMENTARY METHODS**

**SUPPLEMENTARY REFERENCES**

**SUPPLEMENTARY FIGURES 1-7**

## SUPPLEMENTARY METHODS

### In vitro studies

#### *Cell lines and assays*

LC-2/ad (*CCDC6-RET* NSCLC) cells were obtained from Sigma-Aldrich. TT and SW620 cells were obtained from ATCC. MZ-CRC-1 (*RET M918T* MTC) and TPC1 (*CCDC6-RET* thyroid cancer) cells were obtained from Dr. James Fagin, Memorial Sloan Kettering Cancer Center. *RET* gene alteration-negative human cancer cell lines were selected from the Eurofins OncoPanel collection of cell lines (Eurofins). NIH 3T3 and HEK-293 cells were obtained by Array BioPharma. Eurofins cell lines were authenticated by short-tandem repeat (STR) analysis (Genetica DNA Laboratories, Inc., last July 2015). LC-2/ad, TT, MZ-CRC-1 and TPC1 cells were authenticated by confirmation of the presence of each *RET* alteration (e.g. *CCDC6-RET*, *RET C634W*, *RET M918T* or *CCDC6-RET*, respectively) by the OncoPrint Focus Assay NGS assay (Thermo Fisher Scientific, Inc) within 12 months of experiments. Cell lines were tested regularly for Mycoplasma (MycoAlert™, Lonza, Inc. or STAT-Myco, IDEXX, BioResearch, Inc.). Frozen stocks prepared after ~1-2 passages were thawed ~3-6 days (~2-3 passages) before use.

#### *Generation of HEK-293 engineered cell lines and assessment of target activity*

HEK-293 cells stable expressing doxycycline-inducible mutant versions of RET (KIF5B-RET +/- V804M, RET M918T), wild-type KDR/VEGFR2 or wild-type FGFR1 were generated using standard transfection methods.

For assessment of cellular target activity, cells were harvested, counted and added to flat-bottom 96-well assay plates at  $4-5 \times 10^4$  cells/well in 100  $\mu$ L/well of DMEM growth medium containing 10% FBS and 1  $\mu$ g/mL doxycycline, and allowed to attach for 24 hours at 37°C, 5% CO<sub>2</sub>. Cells were treated for one hour with each inhibitor, each prepared as a 1:3 dilution series starting at a maximum of 16.7 or 1.67  $\mu$ M (RET), 5  $\mu$ M (KDR/VEGFR2, FGFR1) or 10  $\mu$ M (Aurora) and a constant DMSO concentration of 0.5%. Control wells contained either 0.5% DMSO alone (no inhibition control) or 1  $\mu$ M LOXO-292 (complete inhibition control). The levels of phosphorylated-RET were determined by In Cell Western assay (LI-COR) using antibodies to phosphorylated-RET (Tyrosine 1062, Santa Cruz Biotechnology) and GAPDH (Millipore). Plates

were analyzed by reading optical density at 700/800 nm using an infrared scanner (Aerius), and the phosphorylated-RET signal for each well was normalized to the GAPDH signal. The levels of phosphorylated KDR/VEGFR2 were determined after 5-minute treatment with human VEGF by sandwich immunoassay using antibodies to total (capture) and phosphorylated KDR/VEGFR2 (detection). Plates were analyzed using an electrochemiluminescent detection instrument (Meso Scale Discovery). The levels of phosphorylated-FGFR1 were determined after 5-minute treatment with human acidic FGF by ELISA assay (R & D Systems), using total FGFR1 (capture) and phosphorylated tyrosine (detection) antibodies. For assessment of Aurora kinase activity, the levels of phosphorylated Histone H3 were determined by In-Cell Western (LI-COR) using antibodies to phosphorylated Histone-H3 (Serine 10, Cell Signaling Technology) and total ERK (Santa Cruz Biotechnology), as for phosphorylated RET. hERG activity in individual HEK-293 cells engineered to express cloned hERG and treated with LOXO-292 at a concentration range of 0-10  $\mu$ M was determined by patch clamp analysis (Charles River Laboratories). For each target, IC<sub>50</sub> values were calculated by 4-parameter logistic regression. hERG IC<sub>50</sub> values for cabozantinib and vandetinib were previously published [1, 2].

## **In vivo studies**

### *Mouse efficacy*

All animals were obtained at 6-8 weeks of age, housed in groups of 5 and allowed a one-week acclimation period before cancer cell injection. Food, water, temperature and humidity were prepared per Pharmacology Testing Facility performance standards which are in accordance with the 1996 Guide for the Care and Use of Laboratory Animals and AAALAC-International.

The KIF5B-RET and KIF5B-RET V804M NIH-3T3 tumor cell lines (5 x 10<sup>6</sup> cells), TT cells (1 x 10<sup>7</sup> cells), or minced tumor fragments derived from prior xenografts of LC-2/a cells, KIF5B-RET PDX (Champions Oncology, CTG-0838), CCDC6-RET PDX (Crown Bioscience, CRL-2518) and CCDC6-RET-V804M PDX (Crown Bioscience, CRL-2545), were injected subcutaneously into the right flank of female nu/nu NCr mice (SCID-beige for LC-2/a). Tumors could grow to ~ 100 - 200 mm<sup>3</sup>, and animals were randomized by tumor size into dosing groups of 7-12 animals. Animals were dosed by oral gavage with vehicle, LOXO-292 at doses of 3, 10, 30 mg/kg and 50 mg/kg (KIF5B-RET PDX) twice daily, cabozantinib at 60 mg/kg (Scid-beige 40

mg/kg) daily or ponatinib at 20-25mg/kg daily. Body weight and tumor size were monitored after cell implantation and at regular intervals during dosing. Tumor diameters were measured with digital calipers, and the tumor volume in mm<sup>3</sup> was calculated by the formula: Volume = ((width)<sup>2</sup> x length)/2.

For the intracranial tumor model, suspensions of the CCDC6-RET PDX (4 x 10e5 cells) were injected orthotopically into the brain. Treatment was initiated 7 days after injection. Animals were monitored at regular intervals and sacrificed for morbid condition. Survival analysis was performed using the Kaplan-Meyer method.

### **PK-PD analysis**

Steady-state minimum and maximum concentrations ( $C_{min}$ ,  $C_{max}$ ) for LOXO-292 were determined from plasma samples collected predose and at defined intervals after dosing on days 1 and 8 of the starting dose and each subsequent dose escalation. LOXO-292 concentration was analyzed using validated LC/MS-MS, and noncompartmental pharmacokinetic parameters were determined.  $C_{min}/C_{max}$  values for vandetanib, cabozantinib and alectinib were obtained from published sources [1-3]. Human plasma and brain protein binding were determined by incubating each inhibitor in 100% human plasma or mouse brain homogenate at 1  $\mu$ M final concentration for 4.5-6 hours, followed by precipitation of proteins and determination of free inhibitor concentration in the supernatant using LC-MS/MS. Estimated CNS penetration for alectinib was obtained from published sources [4].  $IC_{50}$  values for each agent/RET target pair were determined using the HEK-293 cell assays, and were corrected for human plasma protein binding and estimated brain protein binding (LOXO-292) or CNS penetration (alectinib). The percent RET target inhibition at the  $C_{min}/C_{max}$  for each agent was determined with the following formula:

$$\% \text{ target inhibition at each dose} = \frac{[\text{agent}]}{([\text{agent}] + \text{corrected } IC_{50})}$$

### **Tumor mutational analysis**

All tumor molecular profiling was performed at the treating institutions or by Foundation Medicine (tumor tissue) or Guardant (plasma cell-free tumor DNA) in CLIA-approved laboratories (Fig. S7).

## REFERENCES

1. Research CfDEa. NDA 22-405 Clinical Pharmacology Review – Vandetanib 2010.
2. Research CfDEa. NDA 203756 Clinical Pharmacology Review - Cabozantinib 2012.
3. Alecensa Product Information - EMEA/H/C/004161-II/0001. 2017.
4. Kodama T, Hasegawa M, Takanashi K et al. Antitumor activity of the selective ALK inhibitor alectinib in models of intracranial metastases. *Cancer Chemother Pharmacol* 2014; 74: 1023-1028.

A

|          |             |            |           |
|----------|-------------|------------|-----------|
| 5637     | D283 Med    | LC-2/ad    | SH-4      |
| 647-V    | DBTRG-05MG  | M0-91      | SH-77     |
| A101D    | Detroit 562 | MCF7       | SJRH30    |
| A172     | DK-MG       | MDA MB 231 | SK-BR-3   |
| AN3 CA   | DMS114      | MDA MB 453 | SK-LMS-1  |
| AU565    | DMS53       | MDA MB 468 | SK-MEL-28 |
| BFTC-905 | DU145       | MG-63      | SK-N-DZ   |
| BHT-101  | EFM-19      | Mia PaCa-2 | SK-N-FI   |
| BT20     | FaDu        | MV-4-11    | SNB-19    |
| BT474    | HEL-92-1-7  | MZ-CRC-1   | SNU-16    |
| BT-549   | HMCB        | NCI-H292   | SU-DHL-10 |
| BxPC-3   | Hs 578T     | NCIH441    | SW1353    |
| C32      | HT1376      | NCI-H520   | SW579     |
| Cal 27   | HT-29       | NCI-H661   | T24       |
| CAL-62   | J82         | OE19       | T47D      |
| CAMA-1   | JeKo-1      | REC-1      | TCCSUP    |
| CaOV3    | K562        | RT112 84   | TF-1      |
| CGTH-W-1 | KATO III    | SaOS2      | TPC1      |
| CHL-1    | KG-1        | SCaBER     | TT        |
| CML-T1   | KM12-Luc    | SCC-25     | U-138MG   |
| COR-L105 | KPL-1       | SCC-4      | UM-UC-3   |
| CUTO-3   | L-428       | SCC-9      |           |

B

| RET Alteration | LOXO-292              |    |                   | Cabozantinib          |   |                   | Vandetanib            |   |                   |
|----------------|-----------------------|----|-------------------|-----------------------|---|-------------------|-----------------------|---|-------------------|
|                | IC <sub>50</sub> (nM) | n  | Fold vs. LOXO-292 | IC <sub>50</sub> (nM) | n | Fold vs. LOXO-292 | IC <sub>50</sub> (nM) | n | Fold vs. LOXO-292 |
| KIF5B-RET      | 4 ± 2                 | 55 | 1                 | 75 ± 27               | 4 | 19                | 935 ± 679             | 4 | 234               |

**Figure S1.** (A) Cell lines analyzed for Figure 1A left. *RET*-altered cell lines are indicated in red. (B) 50% inhibitory concentrations for LOXO-292, cabozantinib and vandetanib in the cellular phospho-KIF5B-RET assay. Values are mean ± standard deviation. Abbreviations: IC<sub>50</sub>-50% inhibitory concentration; nM-nanomolar; n-number of replicates.

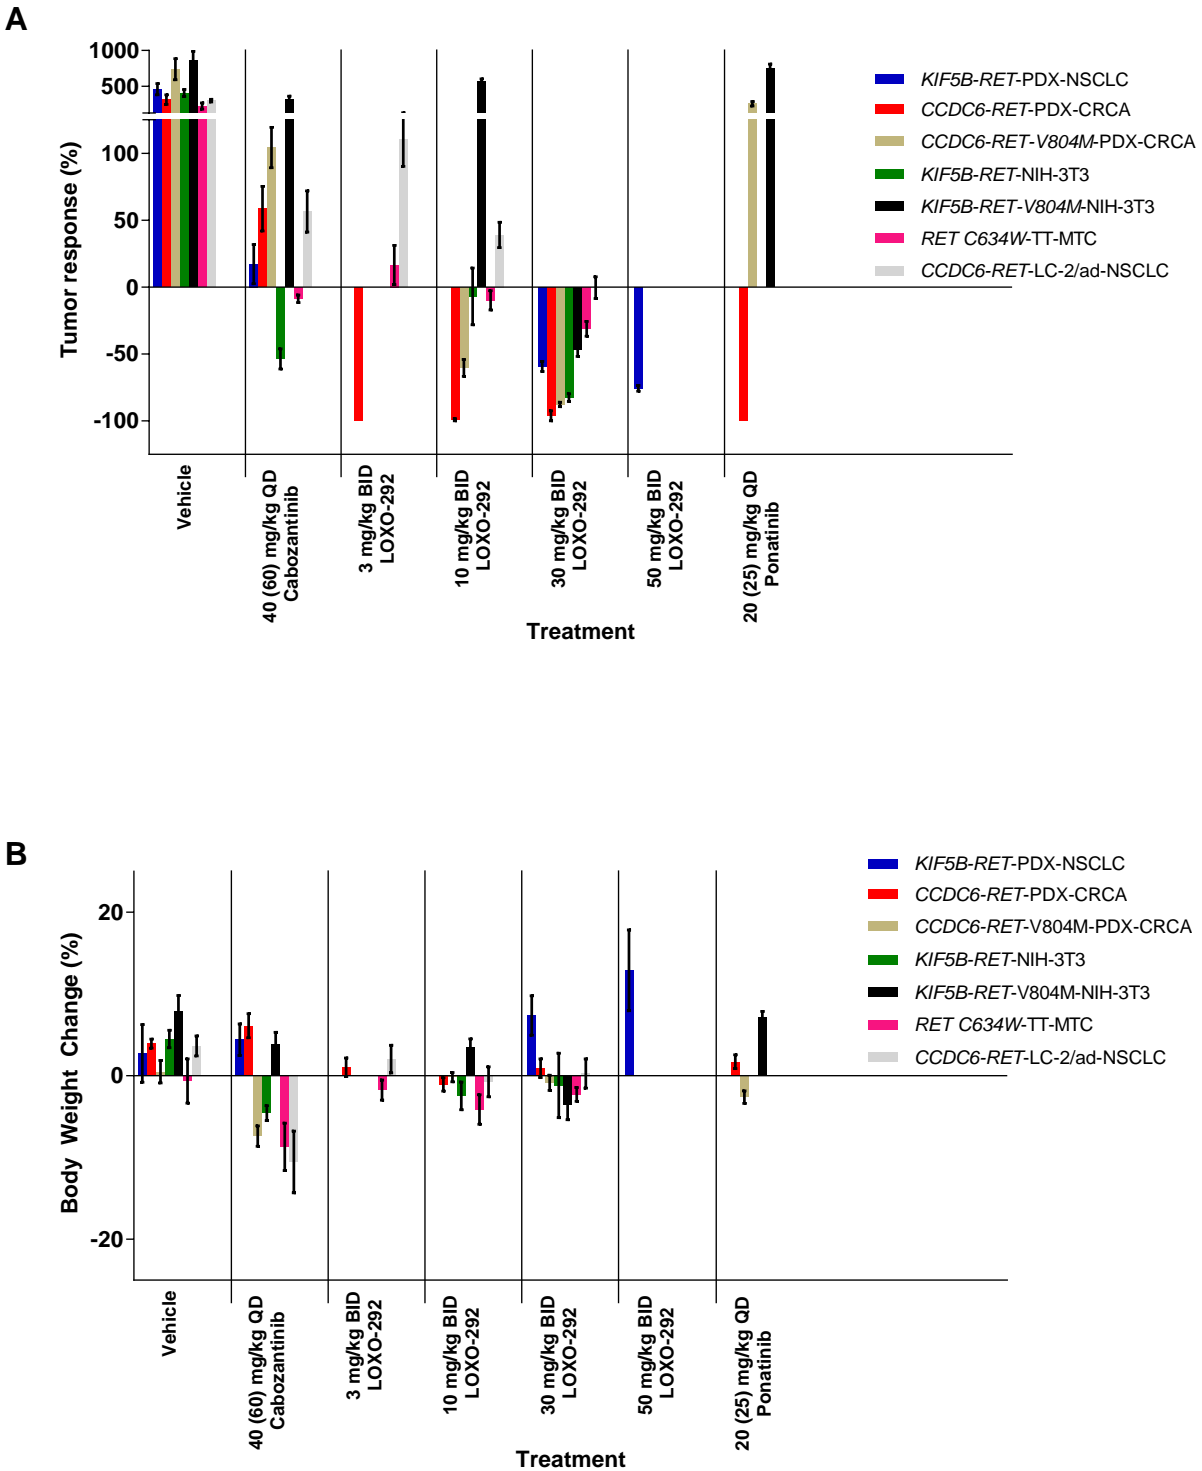



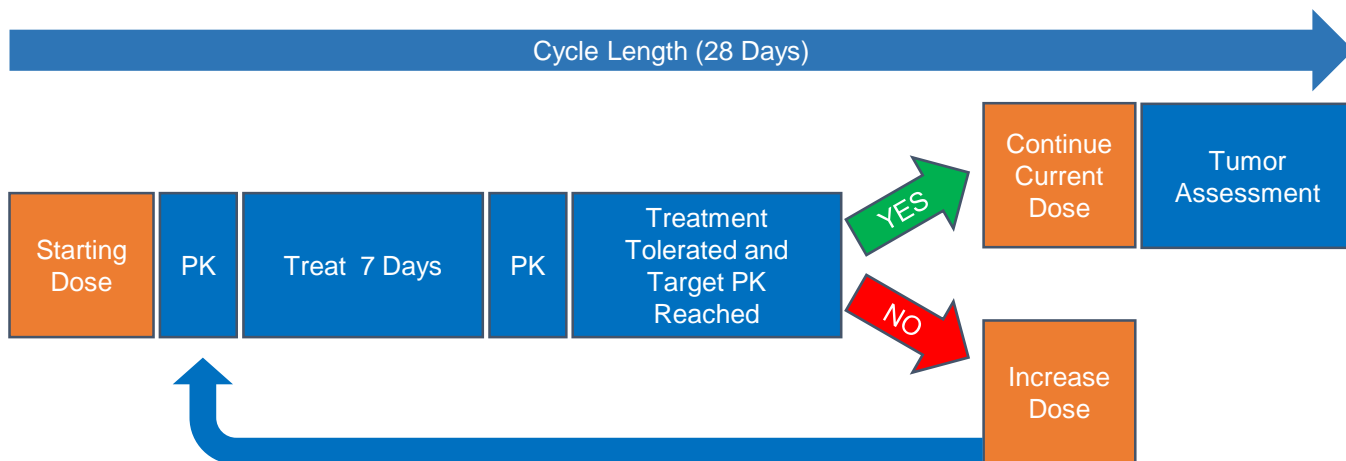

**Figure S3. Single patient protocol study schema.** Abbreviations: PK-pharmacokinetics.

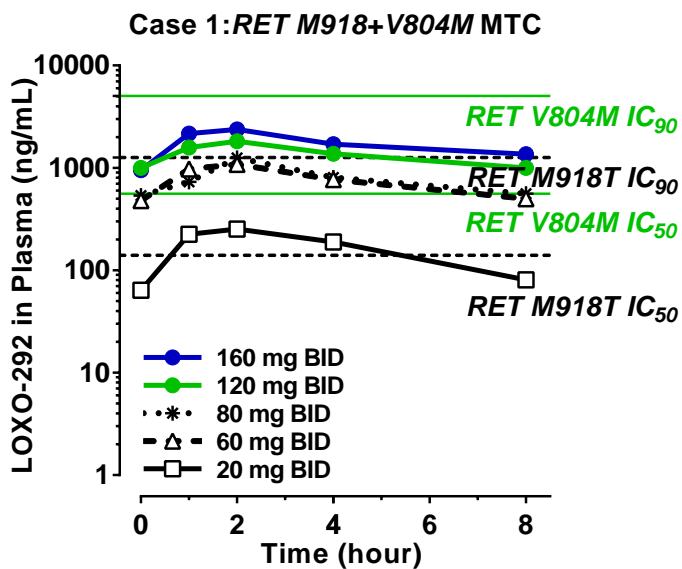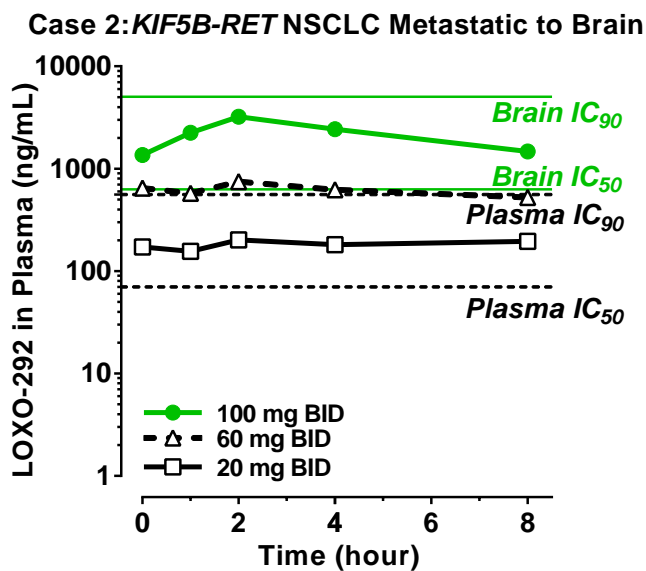

**Figure S4.** Real-time pharmacokinetic analysis for the two patients. Abbreviations: ng-nanograms; mL-milliliters; MTC-medullary thyroid cancer; NSCLC-non-small cell lung cancer;  $IC_{50}$ -half-maximal inhibitory concentration;  $IC_{90}$ -90% maximal inhibitory concentration; BID-twice daily.

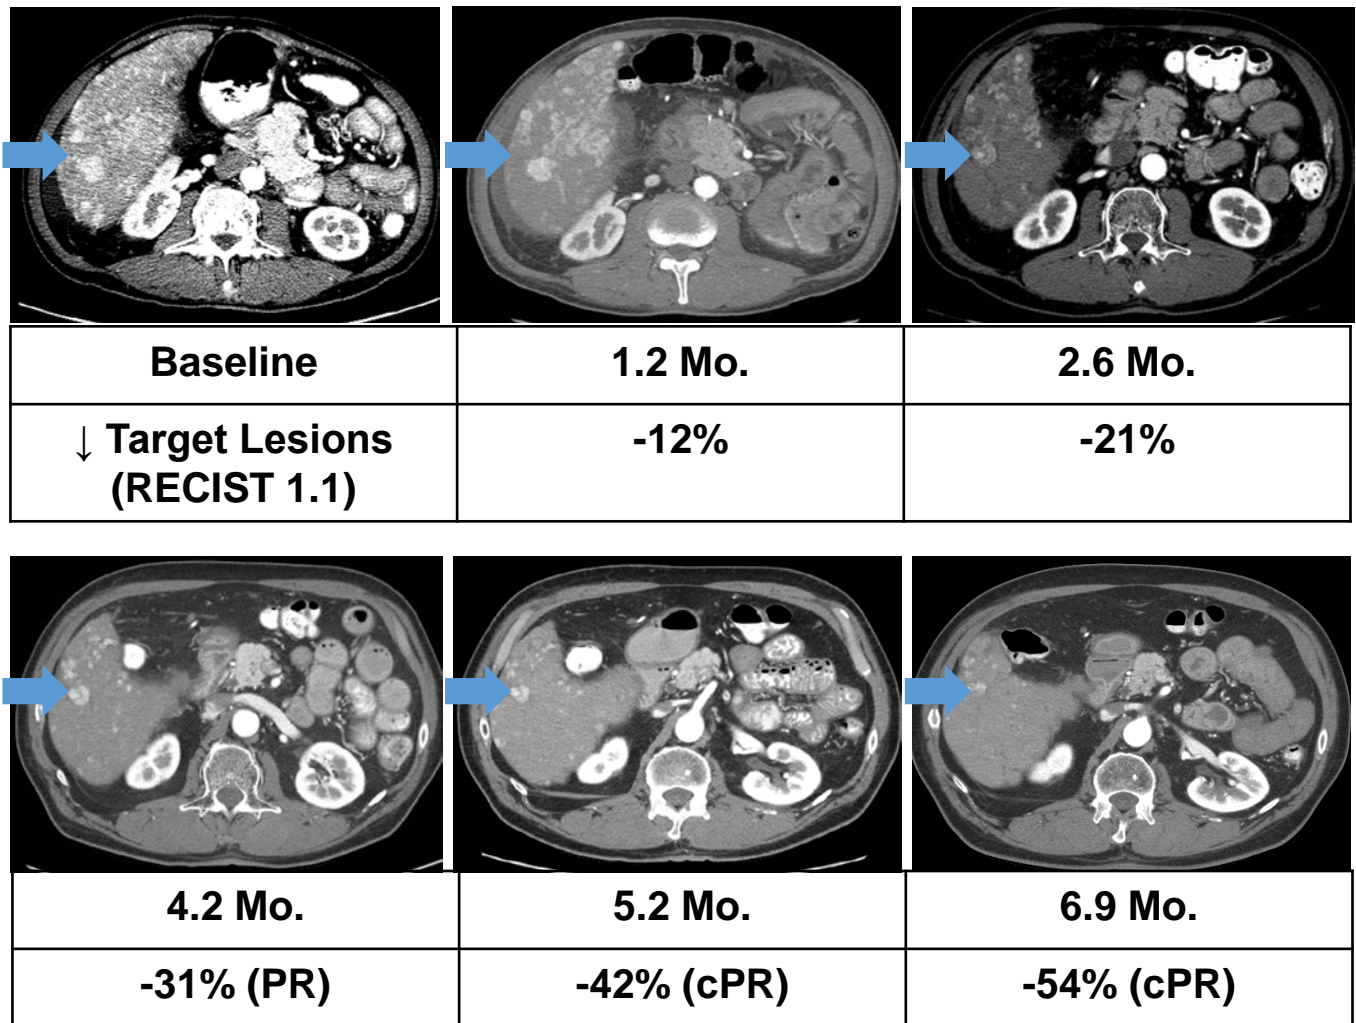

**Figure S5.** Axial images of the liver for Case 1 (*RET M918T + RET V804M MTC*). Note enhancing, infiltrative, non-discrete pattern of liver involvement, and significant decrease with time of LOXO-292 treatment. Abbreviations: Mo.-month; PR-partial response; cPR-confirmed partial response.

**A**

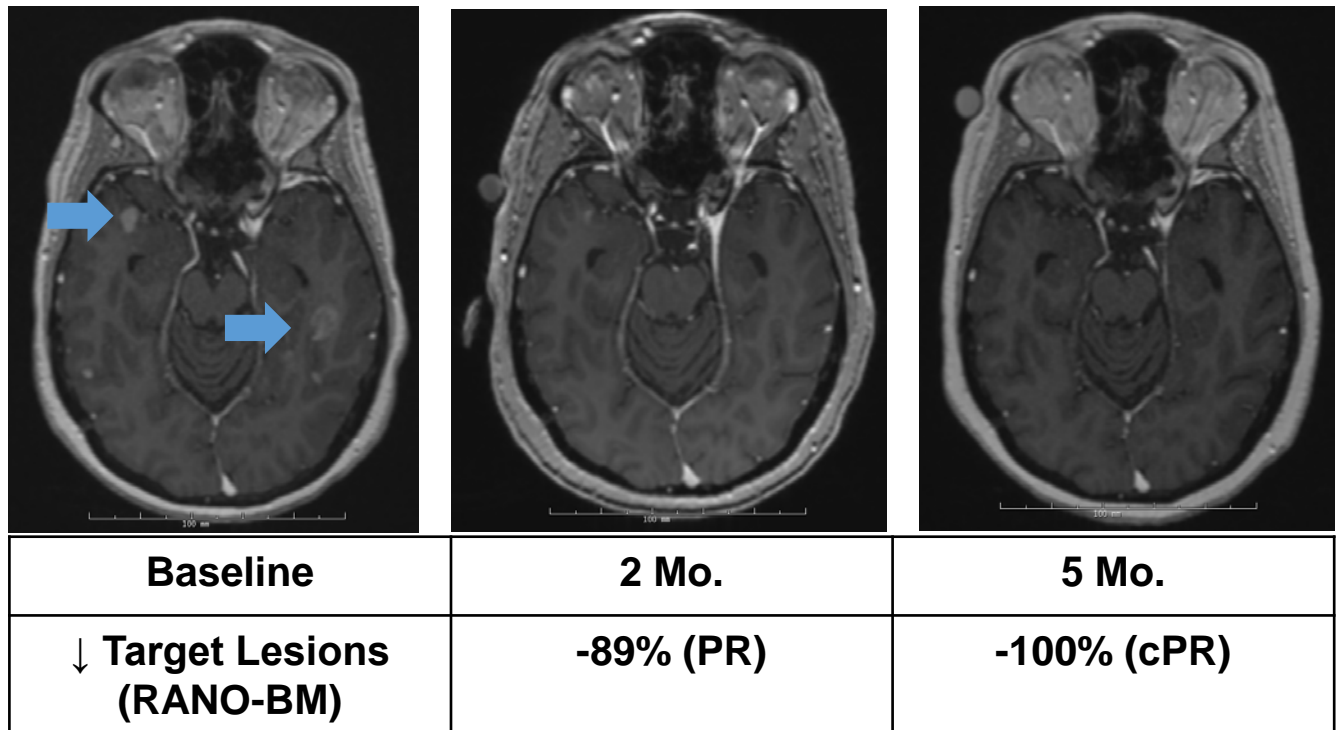

**B**

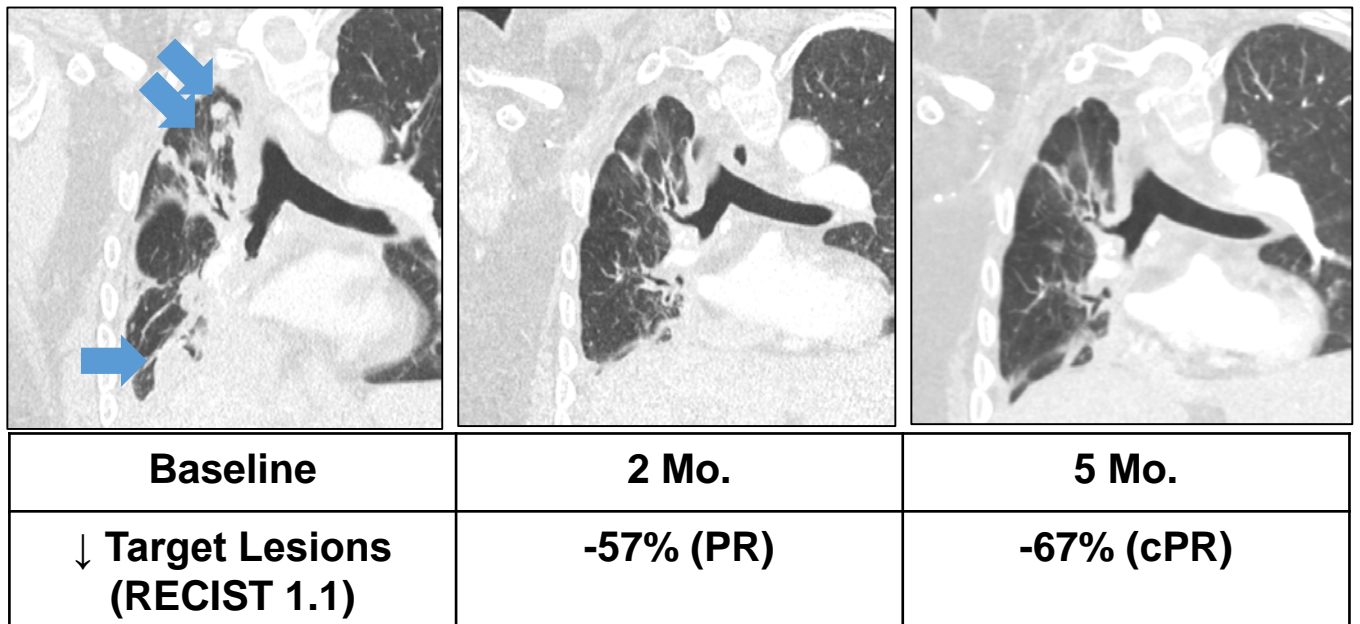

**Figure S6.** (A) Axial images of the brain for Case 2 (*KIF5B-RET* NSCLC) indicating a second target lesion in the right temporal lobe together with the left temporal lobe target lesion shown in Figure 3C. (B) Coronal images of the lungs for Case 2. Blue arrows denote target lesions followed over time. Abbreviations: Mo.-month; PR-partial response; cPR-confirmed partial response.

| Case 1<br>Cancer Mutation - 50 genes (MDACC) |                |               |      |          |       |
|----------------------------------------------|----------------|---------------|------|----------|-------|
| Date of Collection                           | Date of Report | Specimen Site | Gene | Mutation | Notes |
| 10/8/2009                                    | 7/30/2015      | Thyroid Tumor | RET  | M918T    |       |

| Case 1<br>FoundationOne |                |               |        |               |       |
|-------------------------|----------------|---------------|--------|---------------|-------|
| Date of Collection      | Date of Report | Specimen Site | Gene   | Mutation      | Notes |
| 10/8/2009               | 12/17/2014     | Thyroid Tumor | RET    | M918T         |       |
|                         |                |               | SF3B1  | K700E         |       |
|                         |                |               | ARID1B | G319del       | VUS   |
|                         |                |               | ASXL1  | G704W         | VUS   |
|                         |                |               | EPHA3  | S377N         | VUS   |
|                         |                |               | EZH2   | amplification | VUS   |
|                         |                |               | HRAS   | P169fs*4      | VUS   |
|                         |                |               | KEL    | amplification | VUS   |
|                         |                |               | KMT2C  | amplification | VUS   |
|                         |                |               | MLL2   | P4175Q        | VUS   |
|                         |                |               | PALB2  | S689W         | VUS   |
| PIK3R2                  | R65Q           | VUS           |        |               |       |

Abbreviations: VUS--Variant of Unknown Significance

| Case 1<br>Guardant360 |                |               |           |           |           |           |
|-----------------------|----------------|---------------|-----------|-----------|-----------|-----------|
| Date of Collection    | Date of Report | Specimen Site | RET M918T | RET V804M | RET V804L | RET Y806C |
| 5/23/2017             | 6/2/2017       | Plasma        | 12.50%    | 2.20%     | ND        | ND        |
| 6/14/2017             | 6/23/2017      |               | 19.00%    | 1.30%     | 0.40%     | ND        |
| 7/18/2017             | 7/28/2017      |               | 9.10%     | 1.10%     | ND        | ND        |
| 8/16/2017             | 8/29/2017      |               | 2.50%     | 0.70%     | ND        | 0.30%     |
| 11/28/2017            | 12/6/2017      |               | 1.00%     | 0.50%     | ND        | ND        |
| 12/19/2017            | 1/4/2017       |               | 0.60%     | 0.60%     | ND        | ND        |

| Date of Collection | Date of Report | Specimen Site | BRAF AMP | AR R618Q | FGFR1 R58W | RB1 L670fs | EGFR Exon 20 deletion |
|--------------------|----------------|---------------|----------|----------|------------|------------|-----------------------|
| 5/23/2017          | 6/2/2017       | Plasma        | 2.19 (+) | ND       | 0.10%      | ND         | ND                    |
| 6/14/2017          | 6/23/2017      |               | 2.50 (+) | ND       | 0.10%      | 0.20%      | ND                    |
| 7/18/2017          | 7/28/2017      |               | 2.24 (+) | 0.20%    | ND         | ND         | ND                    |
| 8/16/2017          | 8/29/2017      |               | ND       | ND       | 0.09%      | ND         | ND                    |
| 11/28/2017         | 12/6/2017      |               | ND       | ND       | 0.20%      | ND         | ND                    |
| 12/19/2017         | 1/4/2017       |               | ND       | ND       | ND         | ND         | 0.03%                 |

| Case 2<br>FoundationOne |                |               |        |                  |           |
|-------------------------|----------------|---------------|--------|------------------|-----------|
| Date of Collection      | Date of Report | Specimen Site | Gene   | Mutation         | Notes     |
| 6/16/2016               | 8/5/2016       | Lung Tumor    | RET    | KIF5B-RET fusion |           |
|                         |                |               | MLL3   | R1906*           |           |
|                         |                |               | SPTA1  | R891*            | subclonal |
|                         |                |               | CSF1R  | R83G             | VUS       |
|                         |                |               | EZH2   | E649K            | VUS       |
|                         |                |               | HNF1A  | S345C            | VUS       |
|                         |                |               | IRS2   | R693_A694InsA    | VUS       |
|                         |                |               | MAP2K4 | G9R              | VUS       |
|                         |                |               | SETD2  | N1628K           | VUS       |
| TET2                    | R1926C         | VUS           |        |                  |           |
